# Supplementary material for: The Root-Colonizing Endophyte <em>Piriformospora indica</em> Supports Nitrogen-Starved Arabidopsis Seedlings with N Metabolites
Source: Preprints.org preprint supplement (doi:10.20944/preprints202309.0720.v1), 2023-09-12
Supplement: Supplementary file 1 [file supplementary]

**Supplemental Figure 1**


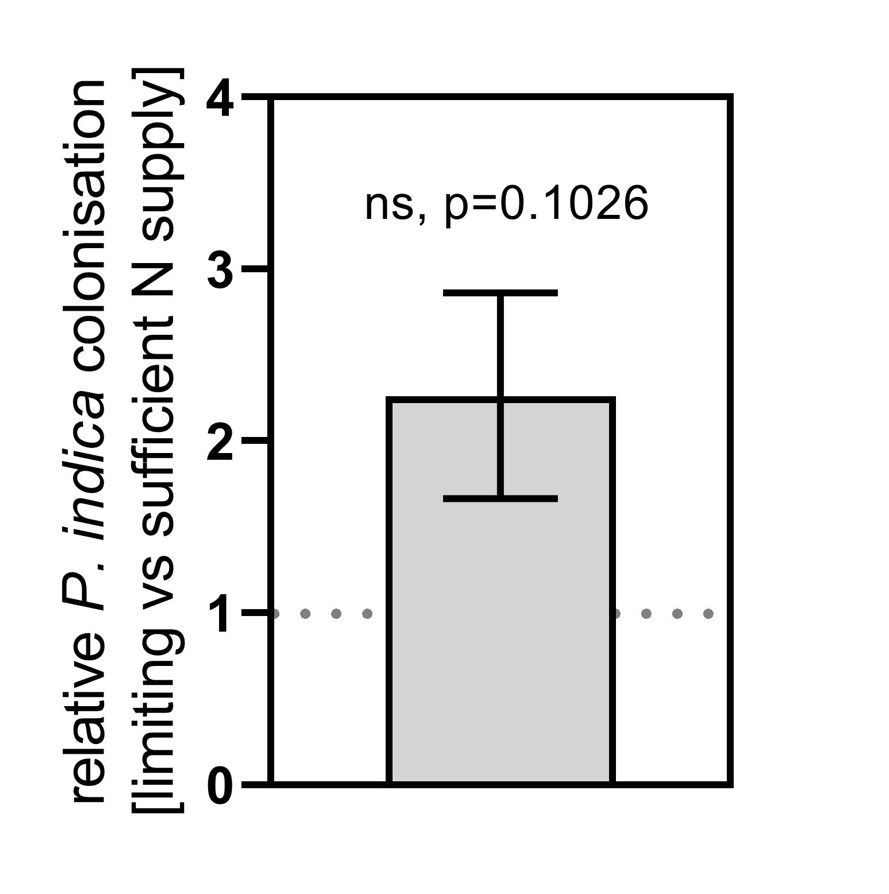


**Figure S1. *P. indica* colonization of *A. thaliana* WT roots under different N conditions.** Shown is the ratio of fungus colonization of plants grown on N-free medium (-N) *vs.* full medium (+N) after 5 days of co-culture, N=3. Fungus colonization was analysed by comparing expression of the fungus housekeeping gene vs. the plants housekeeping gene, see methods for details. Statistics analyses was done by t-test and the obtained p value is indicated in the graph.
